# Supplementary material for: The AI doctor will see you soon: from assistants to autonomous practitioners
Source: publisher site journal article supplement (doi:10.1515/mr-2025-0044), 2025-10-27
Supplement: Supplementary file 1 [file j_mr-2025-0044_suppl_001.docx]

Supplementary Table 1. Recent large AI models perform like doctors or could potentially assist doctors for disease treatment

| **Model** | **Developer** | **Strengths in Cancer Treatment Prediction** | **Weaknesses / Limitations** |
| --- | --- | --- | --- |
| **ChatGPT (GPT-40 / GPT-4.5)** | OpenAI | - Excellent in literature summarization, trial protocol generation, and hypothesis generation.  - Can simulate healthy consultations or suggest treatment options based on guidelines. | - Cannot process real patient electronic health records (EHRs) or imaging directly.  - Lacks training on patient-level outcomes. |
| **DeepSeek (DeepSeek-VL, DeepSeek-Coder)** | DeepSeek | - Strong multilingual and coding capabilities for medical data pipelines.  - Can generate drug repurposing hypotheses from large knowledge bases. | - Limited biomedical domain fine-tuning.  - No real-time access to clinical databases. |
| **Grok 3** | xAI (Elon Musk) | - Fast reasoning with real-time data - May be useful in pharmacovigilance or public sentiment mining (e.g., reactions to drug trials). | - Not trained for biomedical reasoning or treatment prediction.  - No validation in medical use cases. |
| **Claude 3/4 (Opus/Haiku)** | Anthropic | - High performance in reasoning and summarization of complex medical papers.  - Safer outputs for clinical discussions; useful for policy or ethical planning. | - Not optimized for modeling biological systems or drug response.  - Cannot directly ingest omics/imaging. |
| **Gemini 2.5 Pro / Gemini Flash** | Google DeepMind | - Integrated with Google’s biomedical efforts.  - Can process longer contexts and may assist in multi-modal integration.  - Experimental support for genomics and clinical data synthesis. | - Limited documentation on performance in cancer treatment modeling.  - Not yet available for direct EHR or omics modeling in open settings. |

Supplementary Table 2. Examples of deep learning models for cancer treatment for doctor’s assistant

| **Model / Tool** | **Cancer Type** | **Input** | **Predicted Output** | **Key Feature** |
| --- | --- | --- | --- | --- |
| **DeepSurv** | Various | Genomic and Clinical | Survival probability under different treatments | Personalized survival curves |
| **DrugCell** | Various | Somatic mutations and Drug targets | Drug response with Area Under the Curve (AUC) | Biology-informed neural network |
| **PathFinder** | Breast | Whole-slide pathology images | Response to neoadjuvant chemotherapy | Interpretable weakly supervised learning |
| **OncoNet** | NSCLC, breast | EHR and Lab data | Chemo/radiation response, toxicity | Temporal deep learning with Recurrent Neural Networks (RNN) on EHRs |
| **TransMed** | Various | Longitudinal EHRs | Treatment response and disease trajectory | Transformer architecture for EHR data |
